# Supplementary material for: Dichotomy in FcγRIIB deficiency and autoimmune-prone SLAM haplotype clarifies the roles of the Fc receptor in development of autoantibodies and glomerulonephritis
Source: Springer Nature journal article supplement (doi:10.1186/s12865-014-0047-y), 2014-10-23
Supplement: MOESM1 [file 9736038]

# Additional File

## Supplementary Table 1

List of PCR primers and sequence primers in SNP analysis

| Gene           | Forward Primer                                           | Reverse Primer                                         | Sequence Primer                             |
|----------------|----------------------------------------------------------|--------------------------------------------------------|---------------------------------------------|
| <i>AlyRef2</i> | GTGTCAGATGCTGACATTCAG                                    | ATTGTCTGCACAGTCCAGTTG                                  | TACGATCGCTCTGGACGAAG                        |
| <i>Apcs</i>    | GCCAATCTCTGCTACATGAG                                     | GCCAATCTCTGCTACATGAG                                   | GAGCCAAGAGAAAGCGTTTG                        |
| <i>Atf6</i>    | CAAGTGGGCCTGGATTCTGCAACAG                                | GCTTACTTCGCGAGTGCAGCATAAG                              | GAGCGTTGACTTACCAATAG                        |
| <i>Casq</i>    | ACCATCAGAGTCTGGGGAG                                      | ACAGACAGGAAGCAGGGAG                                    | TGTGTGTGTGGCAGGTCCAG                        |
| <i>Cd48</i>    | TGGAGGTGGCTGGAGATAG                                      | TACTTCCCCACCTCCCCAG                                    | CCCAGGTCCCCTTCTCTTG                         |
| <i>Cd84</i>    | TTTCCCATTGGCTCGAGGAG                                     | CTGGAAGTGTGGGAATGAG                                    | CAAGTTCCTTGGCTCCTAG                         |
| <i>Fcer1a</i>  | ATAAGGACTCTGCTGTGGAG                                     | CTCATCTCCATCTGTTTCAG                                   | GTTAATGGTCATTCATGGATG                       |
| <i>Fcer1g</i>  | CTGTGTTCTCAGGAGCTGAG                                     | GATACTCCCTGGGTAGGAAG                                   | CCAAGCTCCACCAGCATGTG                        |
| <i>Fcgr3</i>   | CCTCTCCACGCAAGACTACACAGAG                                | CCACCACTGCCAGTACAGTCAG                                 | TGATGCTTCCCAGAAACCAG                        |
| <i>Fcrg4</i>   | AGAGTTTGAGGCCAGCCTGGTCTATAAAG                            | CTCTTGCTGCCAATCTAACCACCTTAG                            | TAAAGTCTAGGACAGCCAGGG                       |
| <i>Fcrla</i>   | GAGCCCTCTCGGTAGAAGATAACCTGAG                             | GAGGTTTGGTGTCTTCTTCTCTCTCTGAG                          | ATATTCCCAGGGCAGAAGAG                        |
| <i>Fcrlb</i>   | CCAACAACAAAACCACAGCAACAGGAG                              | TCAGTCAGTCACTCCATCCCGAACAG                             | GGCTCCAATTTGCACACAAG                        |
| <i>Ly9</i>     | CTAGCCAGTGGGCTTAGAAG                                     | CTTGTGGCTTCCATGGCTAG                                   | GAACAACCGCTCATCTCGAG                        |
| <i>Mpz</i>     | GGGACATCTTTATGCTGAGACCTTGAGCAG                           | CTGTTGGTTGAAGCTAATTGCCCTTCTCAG                         | CTGAGACCTTGAGCAGATAAAG                      |
| <i>Nuf2</i>    | CTTGGTCTAGGGCAGAGTGTTAATACAG                             | GTCTCTCATGTCAATTGCTCTGATTGCTCTGTAG                     | TGTACCTGGGCAGGGATCAG                        |
| <i>Rgs4</i>    | GGCCTATAAAGCACATGGCAGAAGCAG                              | GTGGTGTGGGGTTTTCACTAGGGTAAG                            | CAAATTGGGTCTTACCCTAG                        |
| <i>Sh2d1b1</i> | GAGCAAACATGTCTTCTACCTGTGAG<br>TTTGACTTCTCCAGACTTGGTCGTAG | GGCCTTTGCACACGCTAAGCAAG<br>GGACAGGCATGGAGATCACCTGTTAAG | TGTGACCAACCTGAAACTG<br>TCGTAGCAAATCTTTCCTTG |
| <i>Slamf6</i>  | GGTACTGCTCTTCTCAGTAG                                     | ACTGCCTGAACAGTGGCAG                                    | AGCCAGACTGCTGCTGAGAG                        |
| <i>Slamf7</i>  | GTCTACCTCCCCAGTGCTG                                      | TAGCTCCACCACACACAG                                     | TGCACTTCTTAAGGGAAGAG                        |
| <i>Slamf8</i>  | CAGCCAGGATCAGGAACAG                                      | CAGCAGAGGGTATAACTGAG                                   | TGTAGGAGGCCTTCCCGGAG                        |
| <i>Slamf9</i>  | GGTTCTCTGACCTTCTCAGTAG                                   | CTTGCAACTGGTTGTCCGAG                                   | CTGCTTCTGAGACTCCAAAG                        |

## Supplementary Table 2

Survival rate of mouse lines

| Strain                                                       | Survival at 45 wk |
|--------------------------------------------------------------|-------------------|
| B6 Female                                                    | 17/17             |
| B6. <i>Ipr</i> Female                                        | 17/17             |
| <i>RIIB</i> <sup>-/-</sup> SENDAI Female                     | 30/30             |
| <i>RIIB</i> <sup>-/-</sup> <i>SLAM</i> <sup>129</sup> Male   | 18/18             |
| <i>RIIB</i> <sup>-/-</sup> TOKYO Male                        | 4/4               |
| <i>RIIB</i> <sup>-/-</sup> TOKYO Female                      | 7/7               |
| <i>RIIB</i> <sup>-/-</sup> <i>SLAM</i> <sup>129</sup> Female | 13/14             |
| <i>RIIB</i> <sup>-/-</sup> SENDAI Male                       | 34/35             |
| <i>SLAM</i> <sup>129</sup> Female                            | 22/23             |
| <i>SLAM</i> <sup>129</sup> Male                              | 26/27             |
| <i>RIIB</i> <sup>-/-</sup> TACONIC Female                    | 0/3               |
| <i>RIIB</i> <sup>-/-</sup> TACONIC Male                      | 2/3               |
| <i>RIIB</i> <sup>-/-</sup> . <i>Ipr</i> Female               | 0/28              |
| <i>RIIB</i> <sup>-/-</sup> . <i>Ipr</i> Male                 | 1/12              |

Data for *Ipr*-harboring mice are from Yajima K et al. (*Eur J Immunol* 2003, **33**:1020–1029) for comparison.

Supplementary Figure 1

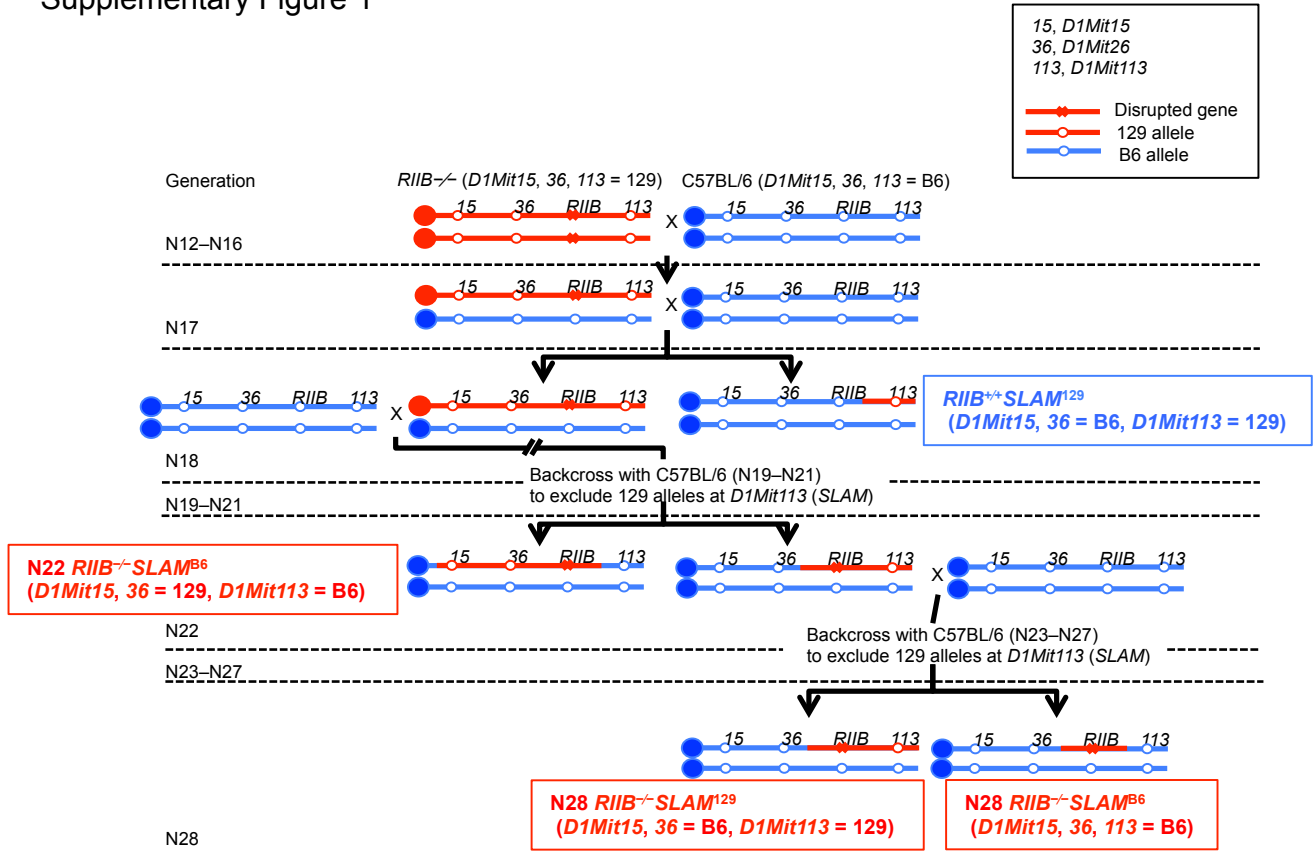

**Supplementary Figure 1. Family tree of *Fcgr2b*-deficient (*RIIB*<sup>-/-</sup>) mice in our laboratory.**

The original *RIIB*<sup>-/-</sup> mice constructed with a 129/B6 hybrid background [13] were backcrossed into the B6 genetic background for 12 generations (N12) as described [16]. At the 18th generation (N18), we obtained *RIIB*<sup>+/+</sup>*SLAM*<sup>129</sup> heterozygotes, which were intercrossed to obtain the *RIIB*<sup>+/+</sup>*SLAM*<sup>129</sup> line. At the 22nd (N22) generation, *RIIB*<sup>-/-</sup>*SLAM*<sup>B6</sup> heterozygotes obtained were intercrossed to generate the N22 *RIIB*<sup>-/-</sup> line. Further backcrossing of N22 offspring into B6 yielded heterozygotes for *RIIB*<sup>-/-</sup>*SLAM*<sup>129</sup> and *RIIB*<sup>-/-</sup> at the 28th generation (N28), each of which was intercrossed to generate homozygotes of N28 *RIIB*<sup>-/-</sup>*SLAM*<sup>129</sup> and N28 *RIIB*<sup>-/-</sup>*SLAM*<sup>B6</sup> (*RIIB*<sup>-/-</sup>). Our *RIIB*<sup>-/-</sup> mouse line is designated as *RIIB*<sup>-/-</sup>SENDAI where it is necessary to distinguish it from those obtained from others. We analyzed the following SSLP markers on chromosome 1: *D1Mit100*, *D1Mit102*, *D1Mit501*, *D1Mit34*, *D1Mit268*, *D1Mit105*, *D1Mit15*, *D1Mit36*, *D1Mit205*, *D1Mit270*, *D1Mit147*, *D1Mit146*, *D1Mit113*, *D1Mit355.2*, *D1Mit150*, *D1Mit221*, and *D1Mit17*.

## Supplementary Figure 2

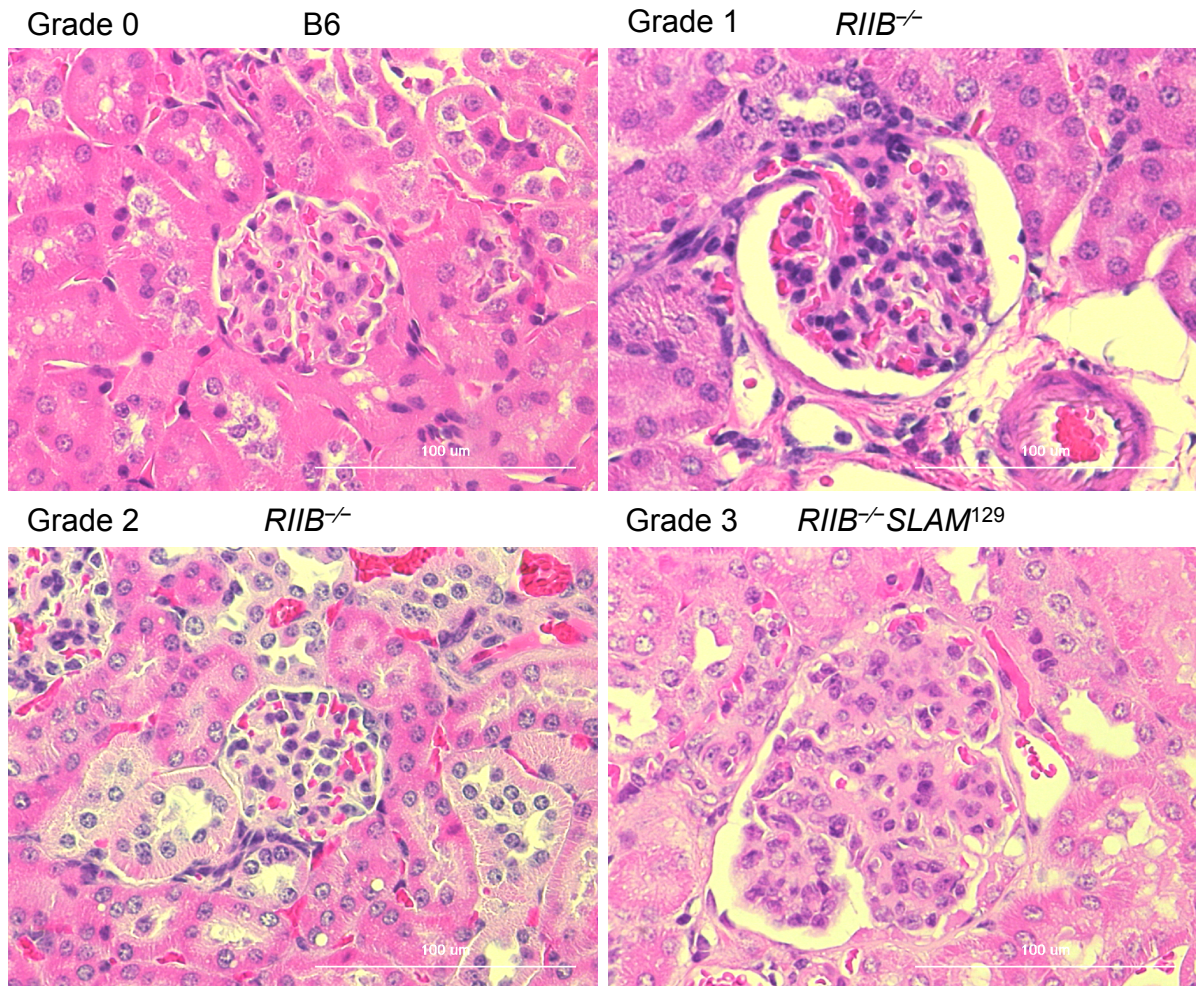

### **Supplementary Figure 2. Estimation of the severity of glomerulonephritis.**

The severity of glomerulonephritis was estimated as follows; grade 0, normal; grade 1, neutrophil infiltration and segmental mesangial proliferation; grade 2, limited lobulated glomeruli in grade 1; and grade 3, crescent formation and severe lobulated glomeruli with lymphocyte infiltration. Representative picture for each score is shown with the source of mouse line.
